# Supplementary material for: Empirical Evidence of Arsenite Oxidase Gene as an Indicator Accounting for Arsenic Phytoextraction by Pteris vittata
Source: MDPI journal article supplement (doi:10.3390/ijerph19031796), 2022-02-04
Supplement: s1 [file s1]

**Table S1** Soil chemical composition of two sites measured by X-ray fluorescence

| Chemical compound              | Composition (%) |       |
|--------------------------------|-----------------|-------|
|                                | MK              | MS    |
| Na <sub>2</sub> O              | 1.10            | 2.30  |
| MgO                            | 2.09            | 0.61  |
| Al <sub>2</sub> O <sub>3</sub> | 19.35           | 15.96 |
| SiO <sub>2</sub>               | 59.07           | 73.96 |
| P <sub>2</sub> O <sub>5</sub>  | 0.22            | 0.46  |
| K <sub>2</sub> O               | 1.70            | 0.74  |
| CaO                            | 1.18            | 2.90  |
| TiO <sub>2</sub>               | 0.89            | 0.67  |
| MnO                            | 0.07            | 0.11  |
| Fe <sub>2</sub> O <sub>3</sub> | 7.15            | 3.99  |

(XRF)
